# Supplementary material for: A public broadly neutralizing antibody class targets a membrane-proximal anchor epitope of influenza virus hemagglutinin
Source: bioRxiv or medRxiv preprint supplement (doi:10.1101/2021.02.25.432905), 2021-02-25
Supplement: Supplementary file [file media-1.pdf]

Figure S1

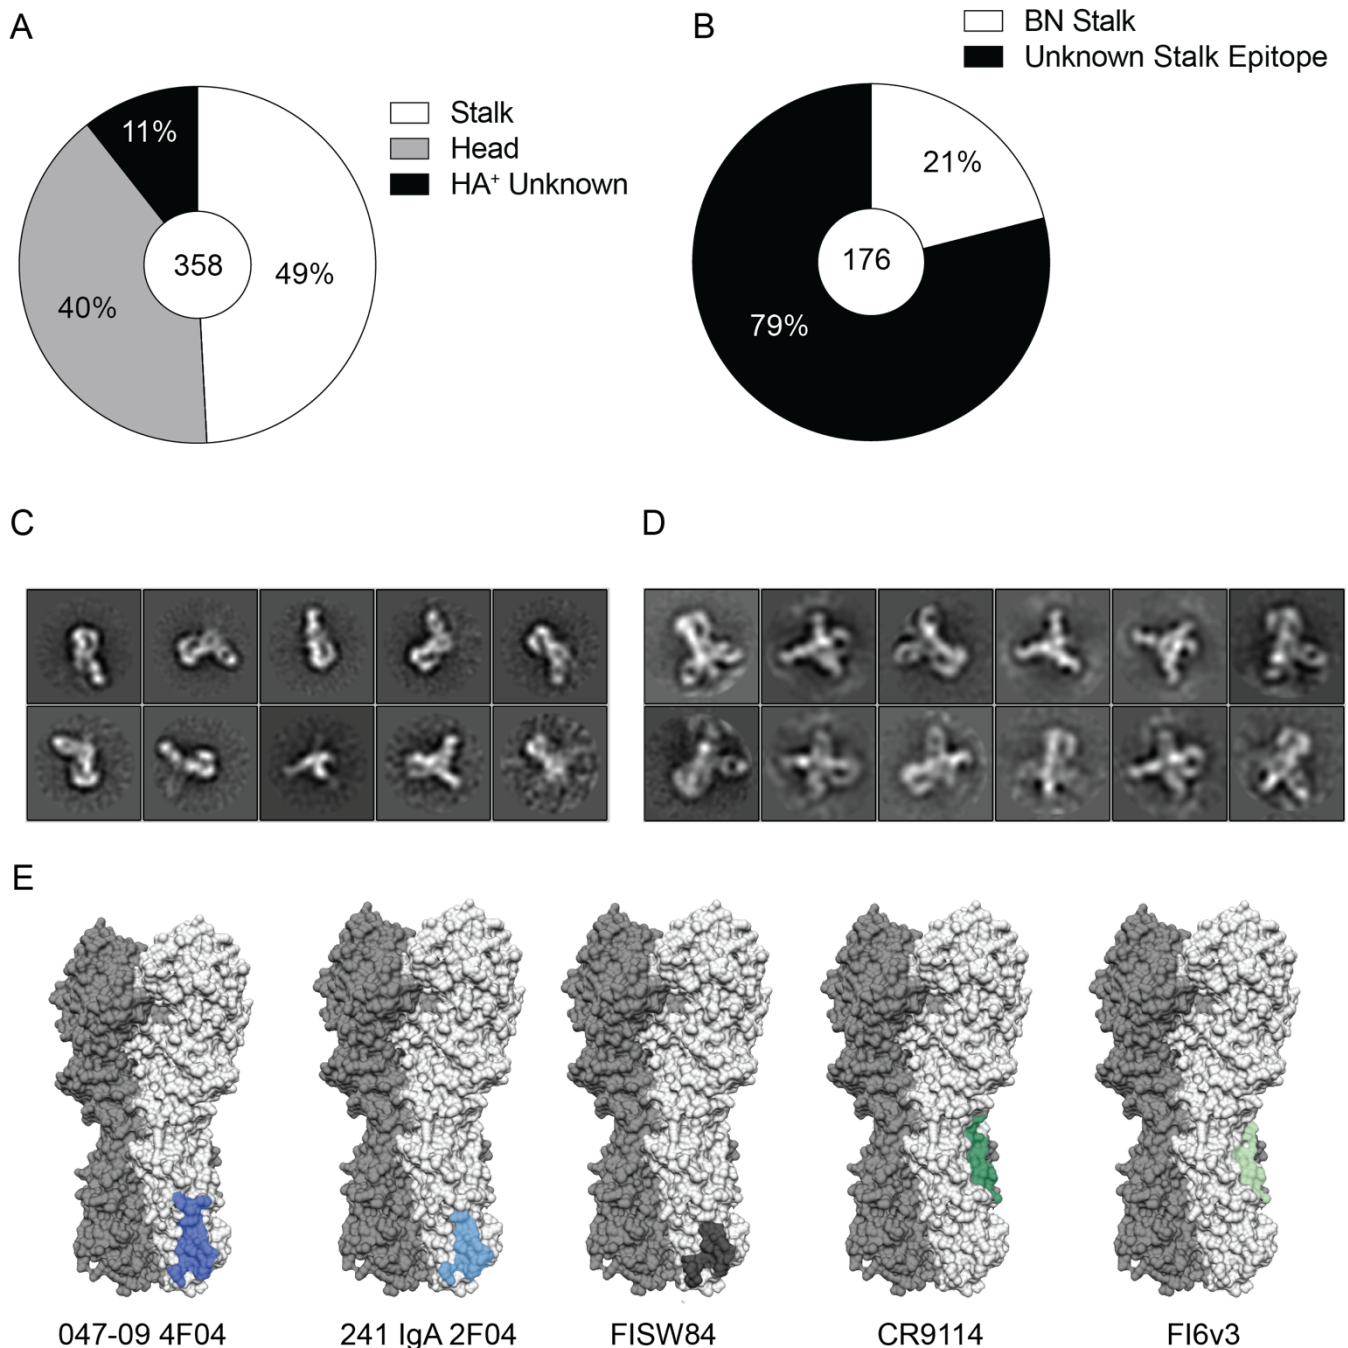

**Figure S1: Binding features of isolated mAbs and 2D class average of anchor epitope binding mAbs. Related to Figure 1. (A)** Proportion of HA<sup>+</sup> mAbs binding to distinct HA domains. **(B)** Proportion of stalk-binding mAbs binding the BN stalk domain. **(C-D)** Negative stain 2D class averages of 047-09 4F04 **(C)** and 241 IgA 2F04 **(D)** binding A/California/4/2009 HA. **(E)** Binding footprint of mAbs binding the anchor epitope (047-09 4F04, 241 IgA 2F04, and FISW84) and the BN stalk epitope (CR9114 and FI6v3) on A/California/7/2009.

Figure S2

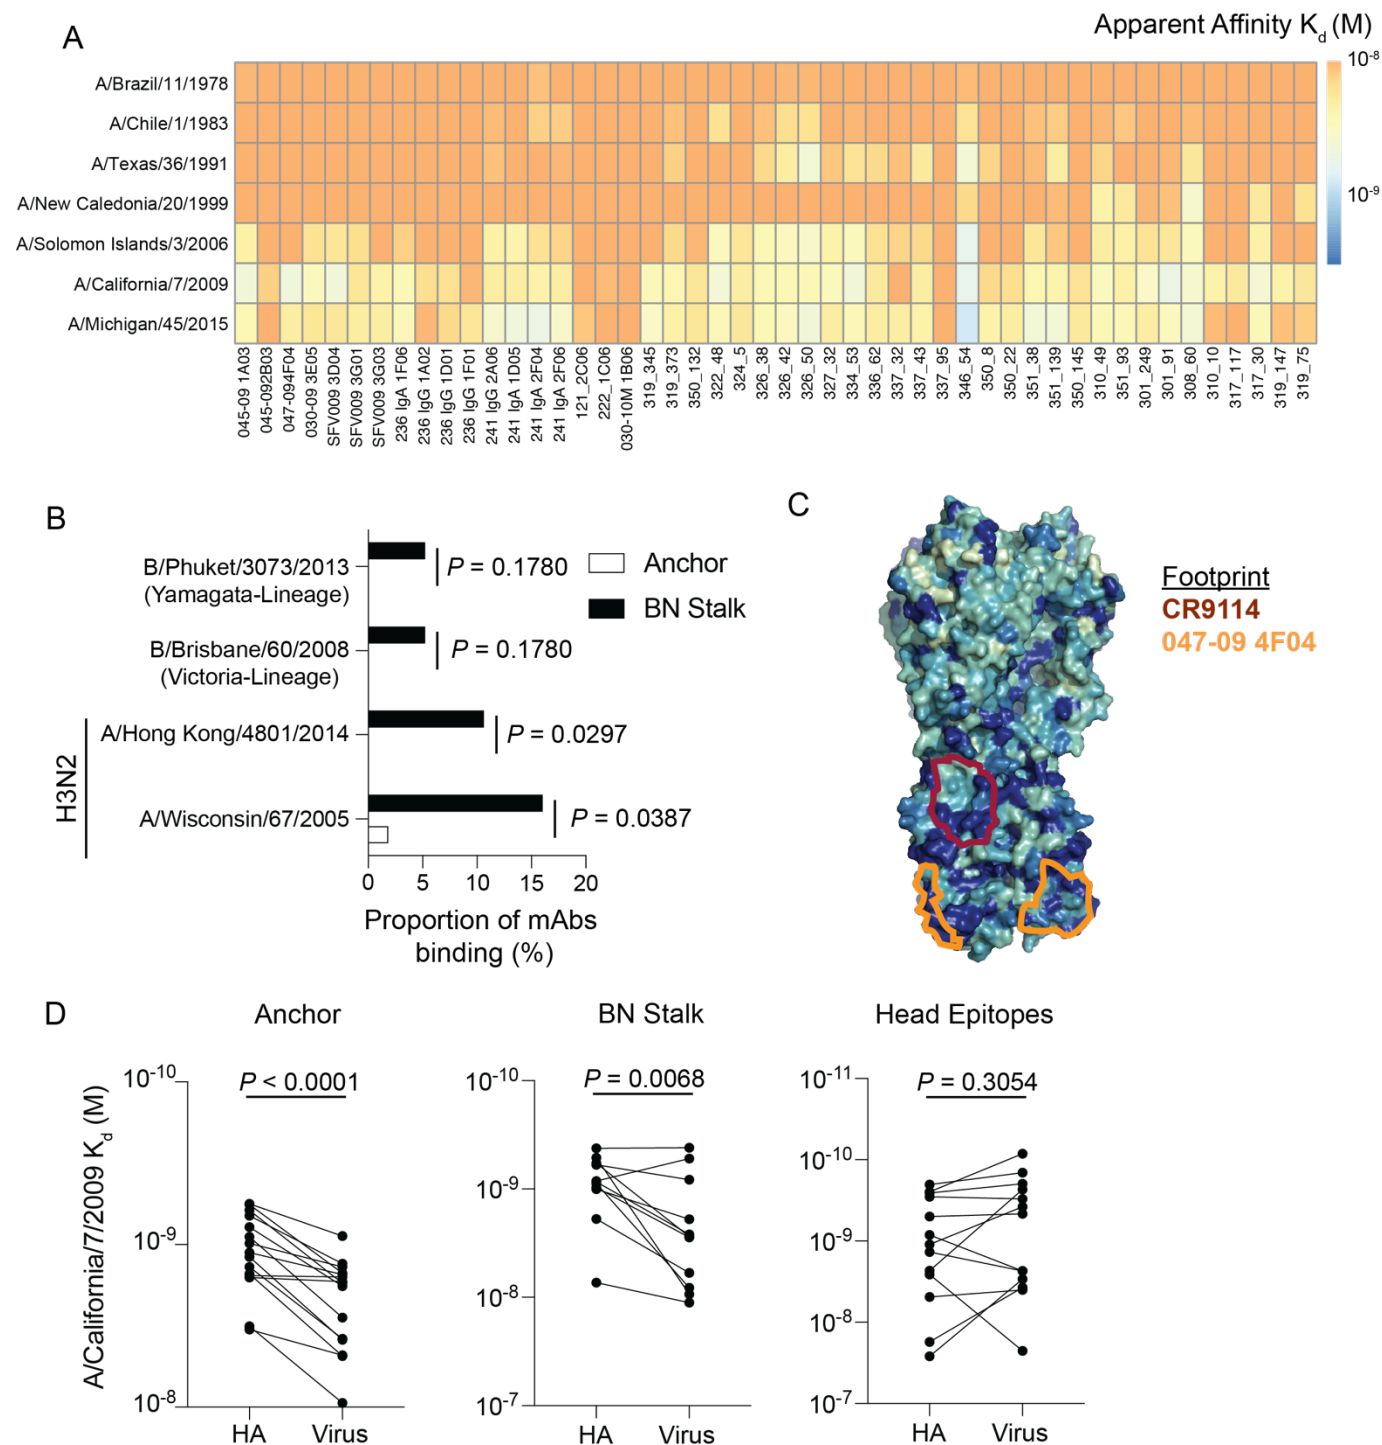

**Figure S2: MAb targeted the anchor epitope binding to distinct H1N1 viruses, H3N2, influenza B viruses and comparison of mAbs binding virus versus HA. Related to Figure 2. (A)** Heatmap of apparent affinity ( $K_d$ ; M) of anchor mAb binding to historical and recent H1N1 viruses. **(B)** Proportion of anchor binding and BN stalk binding mAbs binding to influenza B viruses and H3N2 viruses. **(C)** Conservation of group 1 influenza virus HAs, as shown on A/California/04/2009 (PDB: 4JTV), with the binding footprint of CR9114 (maroon) and 047-09 4F04 (orange) outlined. **(D)** Apparent affinity ( $K_d$ ; M) of mAbs binding anchor, BN stalk, or head epitope binding to recombinant HA from A/California/7/2009 H1N1 and A/California/7/2009 virus. Lines connect the same mAb. Data in **B** were analyzed by Fisher's Exact tests and data in **D** were analyzed using a paired non-parametric Wilcoxon matched-pairs signed rank test.

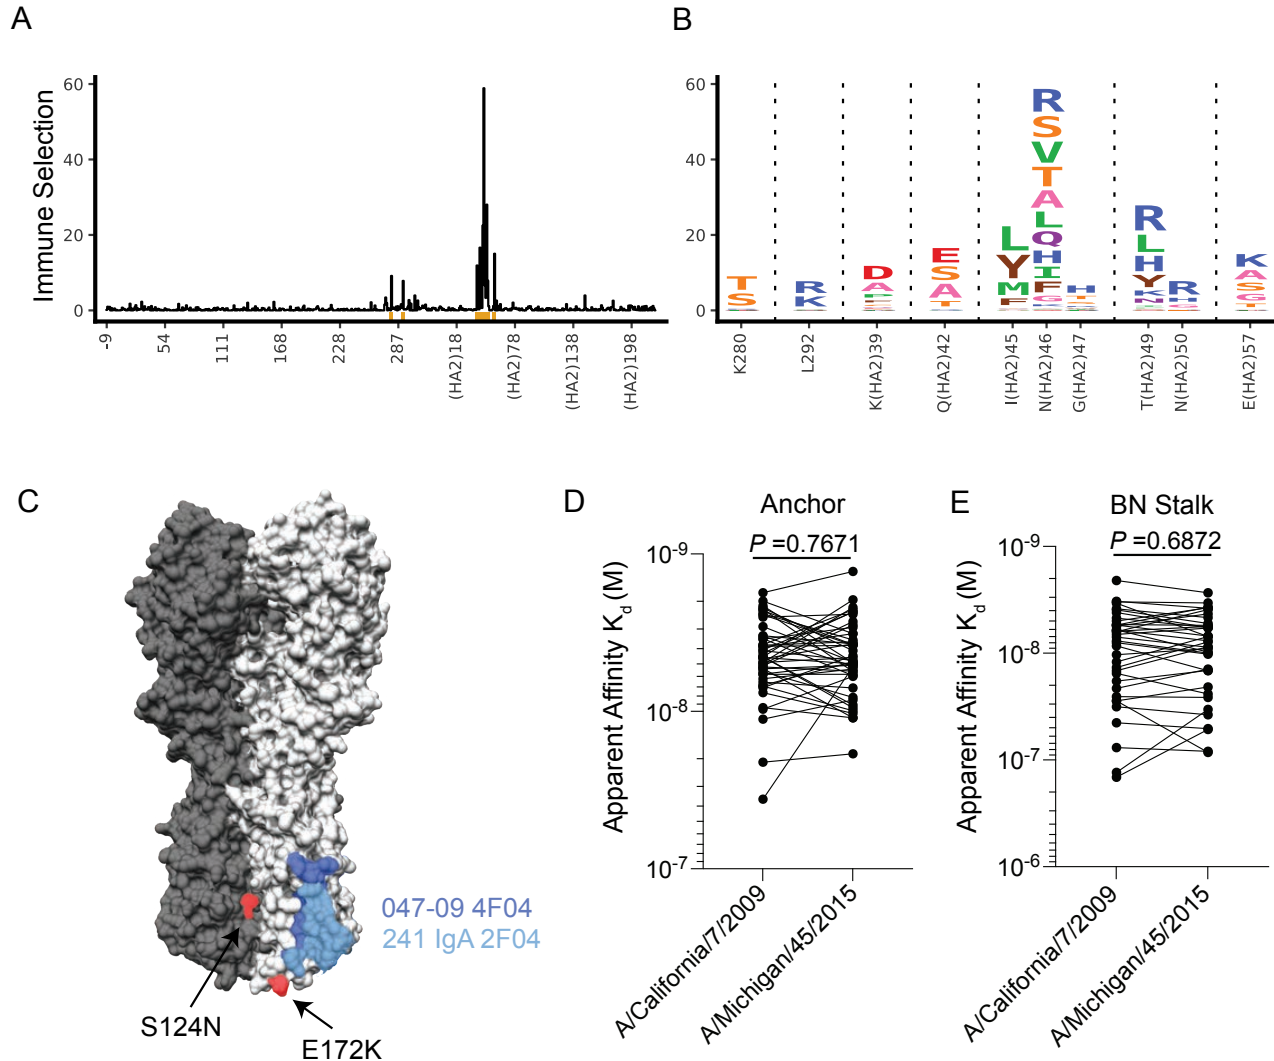

**Figure S3: Deep mutational scanning of 045-09 2B06 and mAb affinity for A/Michigan/45/2015 H1N1. Related to Figure 2.** (A-B) 045-09 2B06 was subjected to deep mutational scanning with a mutant library of A/WSN/1933 (H1N1). (A) Differential selection at each site in HA (H3 numbering). (B) Logo plot of key sites of escape, with the height of each letter proportional to the antibody selection for mutations to that amino acid at that site. (C) Differences in mutations found on the stalk domain of A/Michigan/45/2015 relative to the binding footprints of 047-09 4F04 and 241 IgA 2F04. (D-E) Apparent Affinity ( $K_d$ ; M) of anchor binding mAbs (D) and BN stalk binding mAbs (E) to A/California/7/2009 and A/Michigan/45/2009. Lines connect the same mAb. Data in D and E were analyzed using a paired non-parametric Wilcoxon matched-pairs signed rank test.

Figure S4

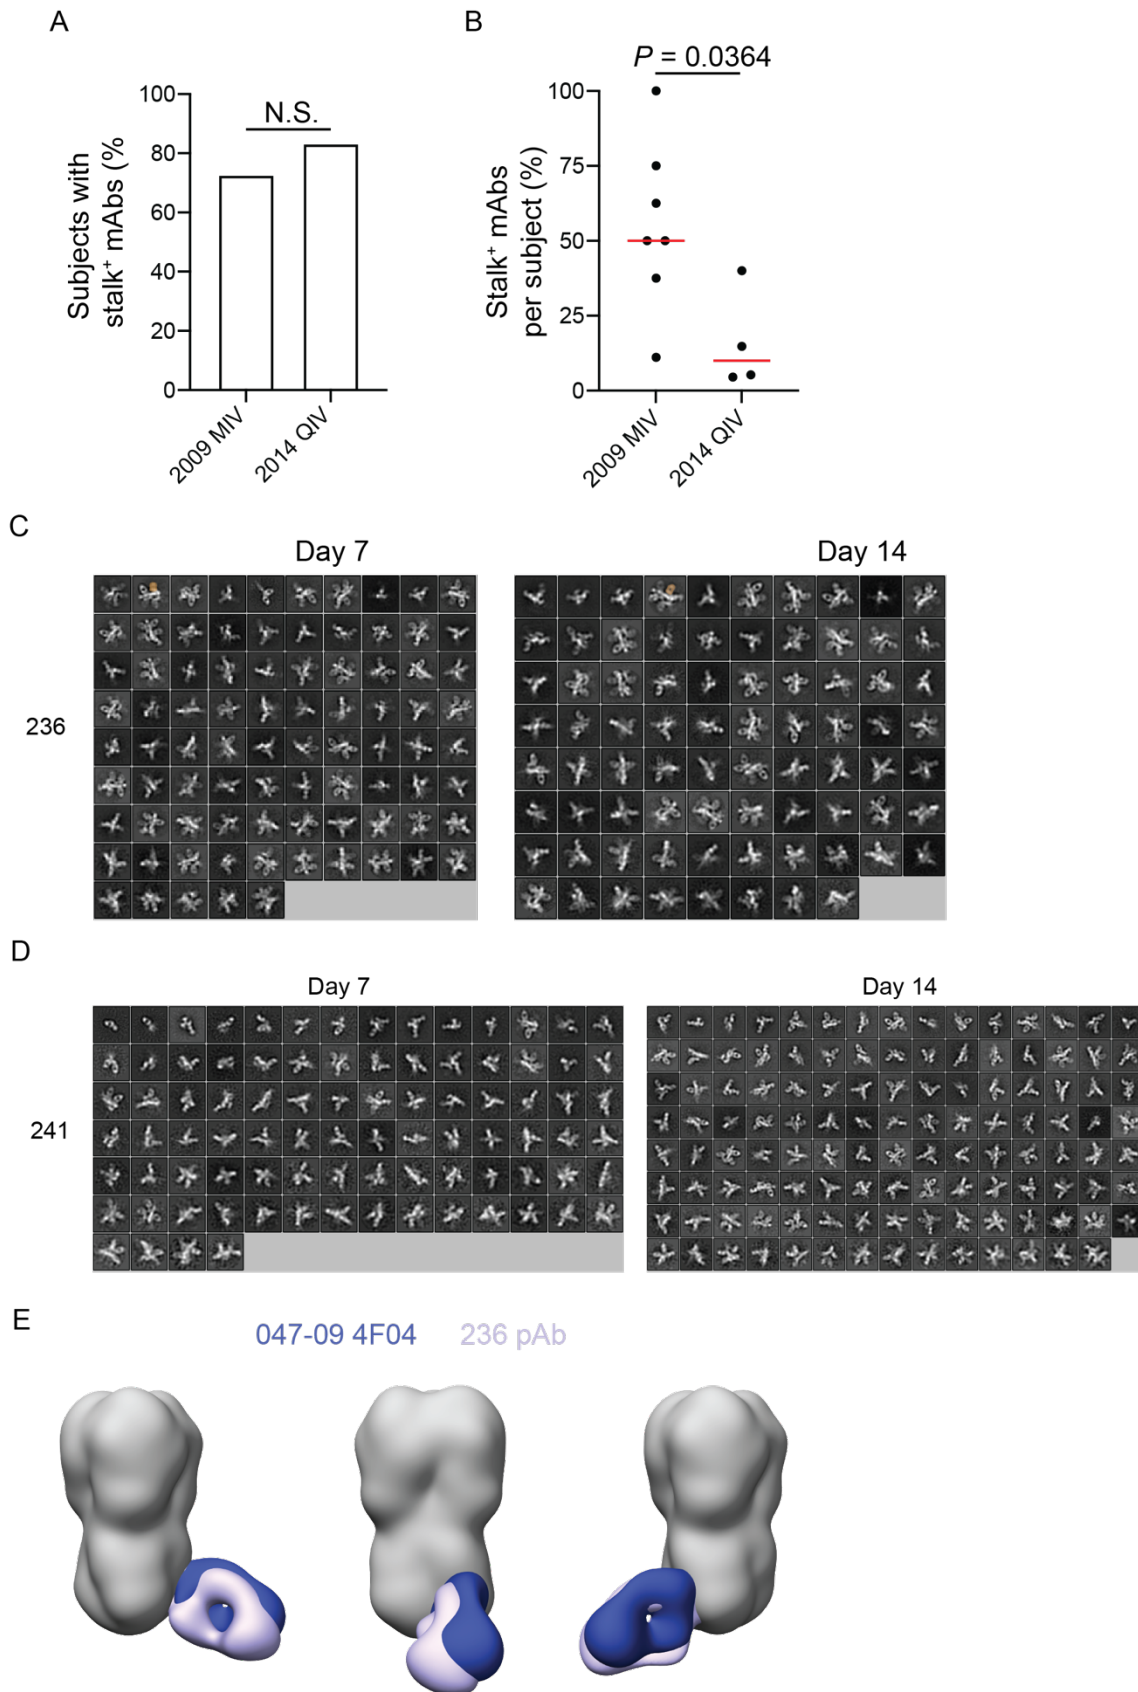

**Figure S4: Characterization of stalk binding mAbs induced by influenza virus vaccines. Related to Figure 4.** (A) Proportion of subjects with stalk<sup>+</sup> mAbs from the 2009 MIV or 2014 QIV cohorts. (B) Proportion of mAbs targeting the stalk per person in the 2009 MIV and 2014 QIV cohorts. Red line represents the median. Each symbol in **B** represents one subject. Only subjects with stalk<sup>+</sup> mAbs were included in the analysis. (C-D) 2D class averages of pAbs from subject 236 (C) and 241 (D) at days 7 and 14 post immunization binding to A/Michigan/45/2015 HA. (E) 3D reconstruction of the overlapping of 047-09 4F04, 236 pAb, and FISW84. Data in **A** were analyzed by Fisher's Exact tests and data in **B** were analyzed by unpaired non-parametric Mann-Whitney test.

Figure S5

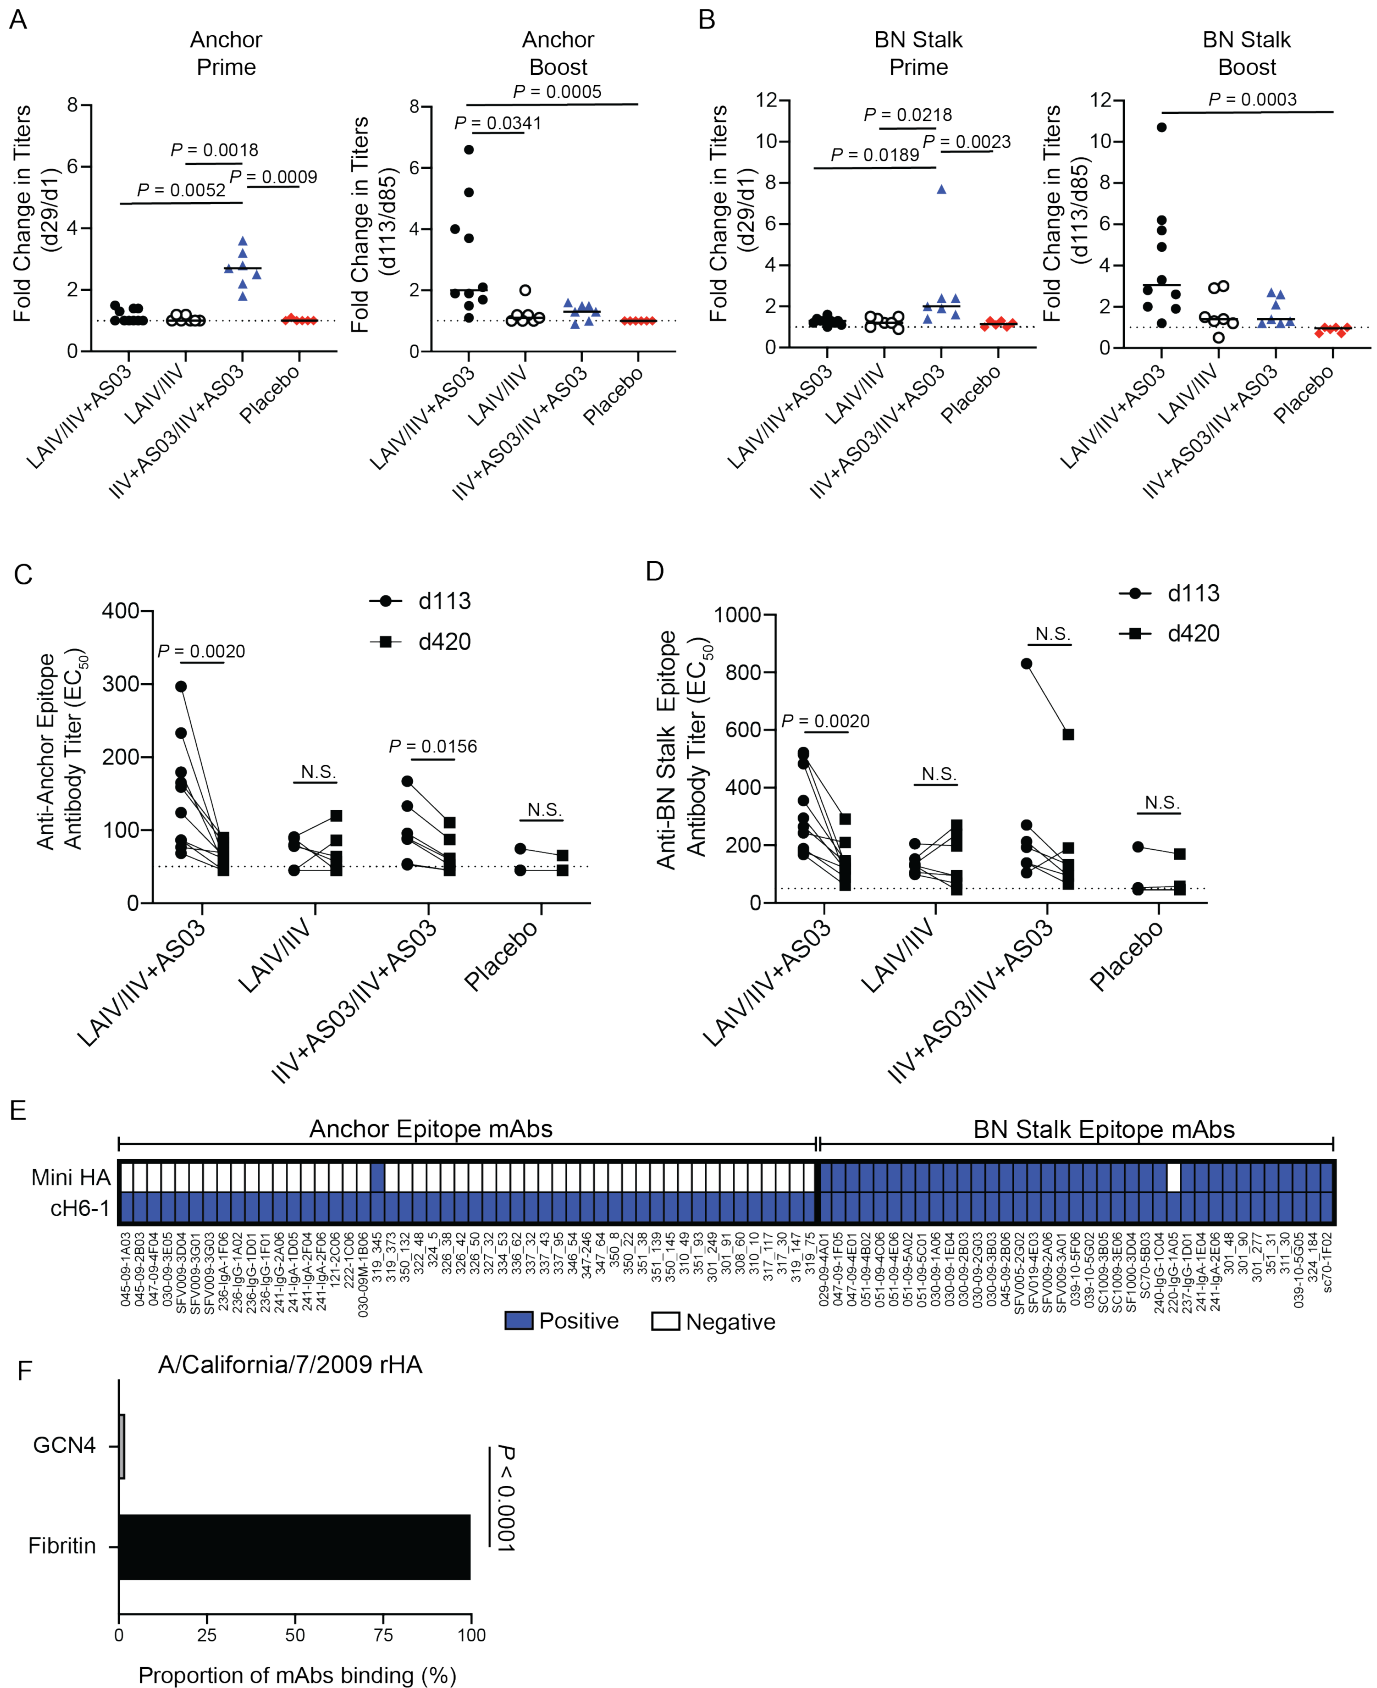

**Figure S5: Seroconversion against anchor and BN stalk epitopes after cHA vaccination and mAb binding to various recombinant HAs. Related to Figure 5. (A-B)** Seroconversion (d28/d0) of antibodies competing for binding against the anchor epitope (A) and the BN stalk epitope (B). Bar represents the

median and each symbol represents one subject. **(C-D)** Antibody titers ( $EC_{50}$ ) of serum antibodies collected on day 112 and day 420 against the anchor epitope **(C)** and the BN stalk epitope **(D)**. Lines connect titers from the same subject and each pair of symbols represents one subject. **(E)** Anchor and BN stalk targeting mAbs binding to mini-HA and cH6/1. **(F)** Proportion of anchor epitope targeting mAbs binding to A/California/7/2009 recombinant HA with a GCN4 or fibritin trimerization domain. Data in **A** and **B** were analyzed by non-parametric Kruskal-Wallis Tests, data in **C** and **D** were analyzed using a paired non-parametric Wilcoxon matched-pairs signed rank test, and data in **F** were analyzed by a Fisher's Exact test.

Figure S6

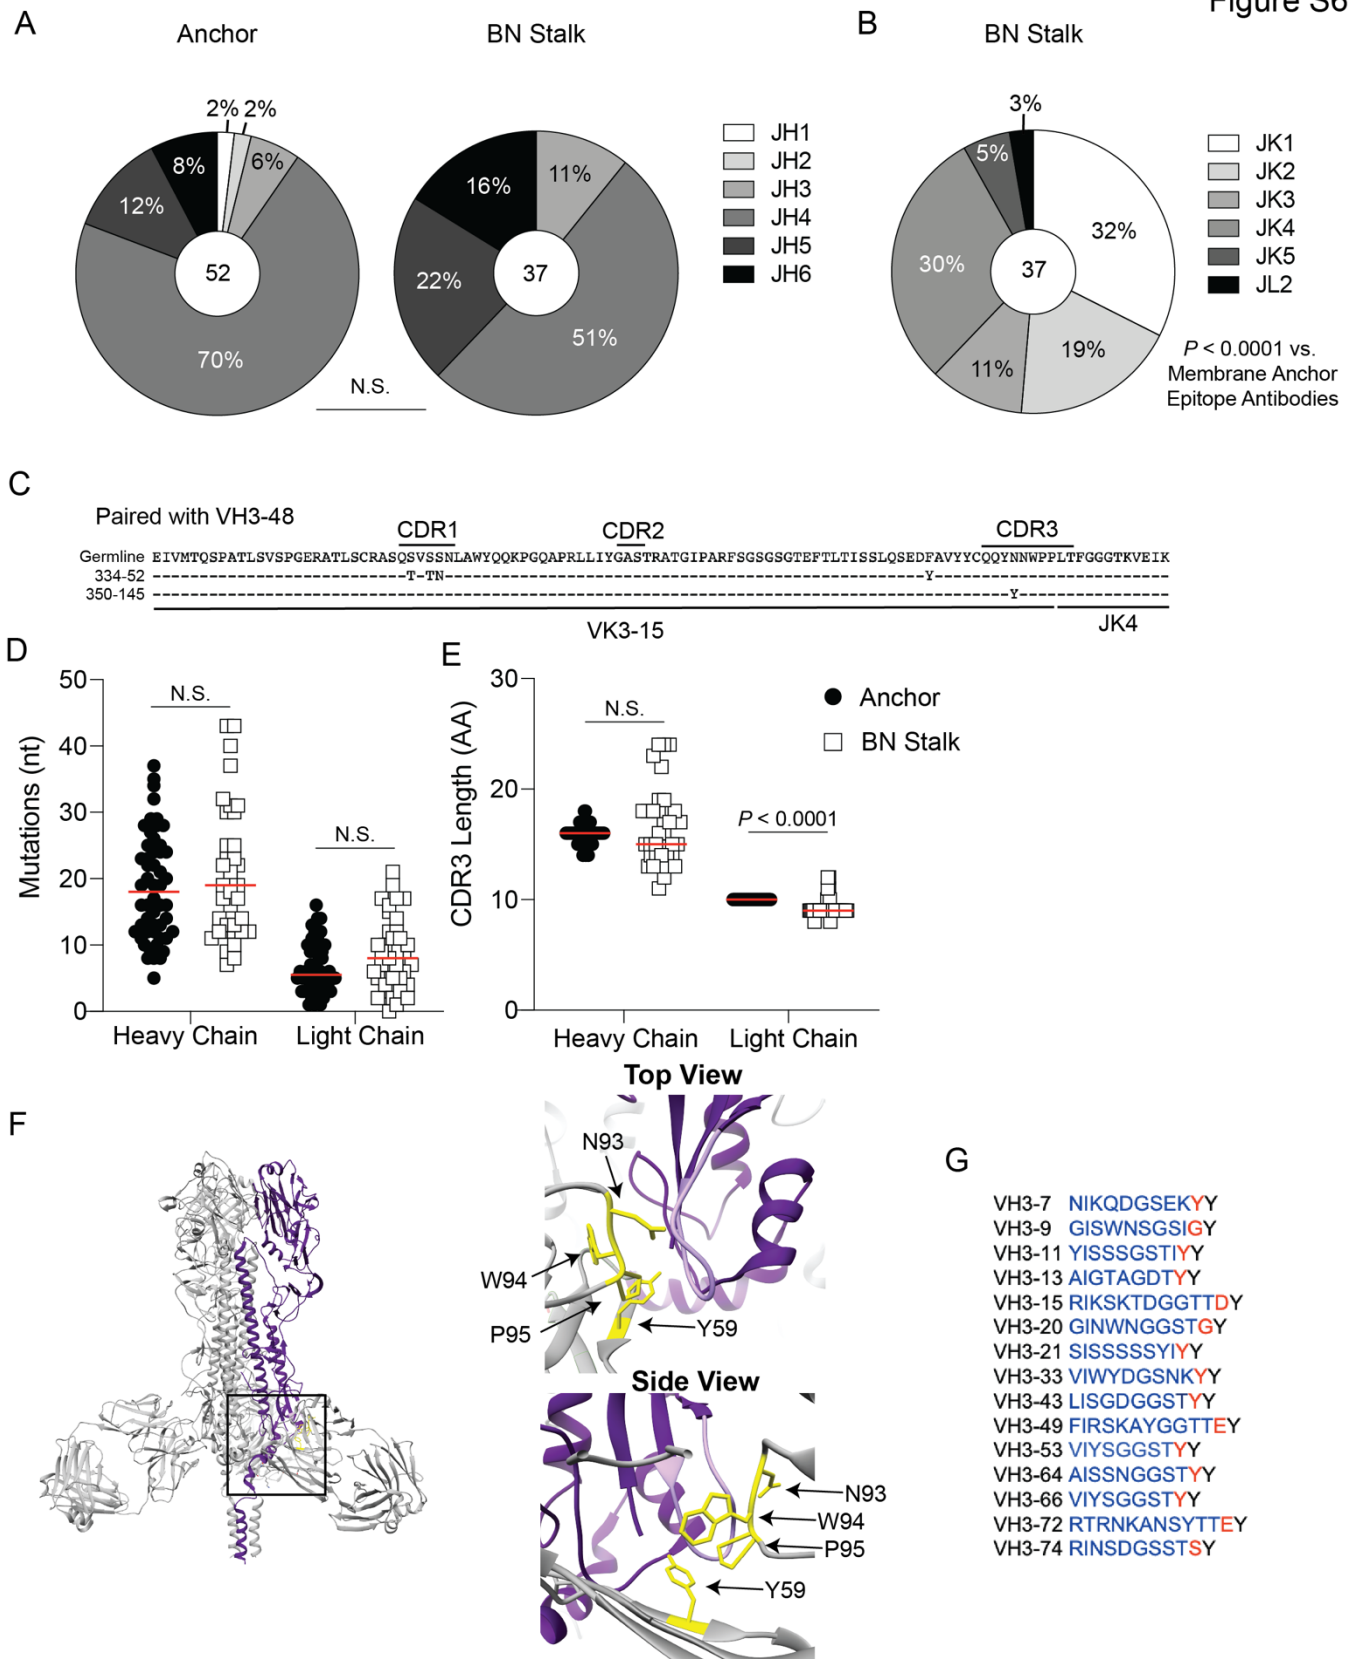

**Figure S6: Additional repertoire features of mAbs binding the anchor epitope. Related to Figure 6.** (A) JH gene usage by anchor and BN stalk binding antibodies. (B) JK gene usage of mAbs binding the BN stalk epitope. (C) VJ sequences of kappa chains of the public clone paired VH3-48. (D-E) Mutations (D) and CDR3 amino acid (AA) lengths (E) of heavy and light chains of mAbs binding the anchor or BN stalk



epitopes. Red bar represents median. **(F)** NWP motif of K-CDR3 and Y59 following H-CDR2 **(H)** of FISW84 (PDB: 6HJQ). **(G)** H-CDR2 sequences of germline VH3 genes. H-CDR2 is highlighted in blue and the first amino acid following H-CDR2 is highlighted in red. Data in **A** were analyzed using a Chi-square test, and data in **D** and **E** were analyzed by unpaired non-parametric Mann-Whitney tests.

**Table S1: Subject information and demographics.**

| <b>Subject</b>     | <b>Vaccine/Infection</b> | <b>Age</b> | <b>Sex</b> |
|--------------------|--------------------------|------------|------------|
| 029-09             | 2009 MIV                 | 24         | M          |
| 030-09             | 2009 MIV                 | 31         | F          |
| 045-09             | 2009 MIV                 | 24         | M          |
| 047-09             | 2009 MIV                 | 22         | M          |
| 051-09             | 2009 MIV                 | 42         | M          |
| SFV005             | 2009 MIV                 | 60         | F          |
| SFV009             | 2009 MIV                 | 31         | F          |
| SFV015             | 2009 MIV                 | 48         | F          |
| SFV018             | 2009 MIV                 | 58         | F          |
| SFV019             | 2009 MIV                 | 48         | F          |
| SFV020             | 2009 MIV                 | 64         | F          |
| sc70               | 2009 pH1N1 Infection     | 38         | F          |
| sc1009             | 2009 pH1N1 Infection     | 21         | M          |
| SF1000             | 2009 pH1N1 Infection     | 37         | M          |
| 008-10             | 2010 TIV                 | 26         | F          |
| 011-10             | 2010 TIV                 | 30         | M          |
| 014-10             | 2010 TIV                 | 27         | M          |
| 017-10             | 2010 TIV                 | 24         | M          |
| 019-10             | 2010 TIV                 | 22         | F          |
| 028-10             | 2010 TIV                 | 38         | M          |
| 034-10             | 2010 TIV                 | 39         | F          |
| 039-10             | 2010 TIV                 | 25         | M          |
| 051-10             | 2010 TIV                 | 43         | M          |
| 220-14             | 2014 QIV                 | 24         | F          |
| 221-14             | 2014 QIV                 | 34         | F          |
| 236-14             | 2014 QIV                 | 32         | F          |
| 237-14             | 2014 QIV                 | 32         | F          |
| 240-14             | 2014 QIV                 | 28         | M          |
| 241-14             | 2014 QIV                 | 29         | F          |
| 121/324 (d7/d112)  | cHA – IIV+AS03/IIV+AS03  | 24         | F          |
| 222/310 (d91/d112) | cHA – LAIV/IIV+AS03      | 25         | F          |
| 301                | cHA – IIV+AS03/IIV+AS03  | 34         | F          |
| 308                | cHA – LAIV/IIV+AS03      | 29         | F          |
| 311                | cHA – IIV+AS03/IIV+AS03  | 28         | M          |
| 317                | cHA – LAIV/IIV+AS03      | 37         | M          |
| 319                | cHA – LAIV/IIV+AS03      | 31         | F          |
| 322                | cHA – IIV+AS03/IIV+AS03  | 20         | F          |
| 326                | cHA – LAIV/IIV           | 27         | M          |
| 327                | cHA – LAIV/IIV+AS03      | 22         | F          |
| 334                | cHA – LAIV/IIV+AS03      | 33         | M          |

|     |                         |    |   |
|-----|-------------------------|----|---|
| 336 | cHA – LAIV/IIV+AS03     | 36 | F |
| 337 | cHA – LAIV/IIV+AS03     | 27 | F |
| 346 | cHA – LAIV/IIV          | 20 | F |
| 347 | cHA – LAIV/IIV+AS03     | 31 | F |
| 350 | cHA – LAIV/IIV+AS03     | 35 | F |
| 351 | cHA – IIV+AS03/IIV+AS03 | 27 | F |

**Table S2: Anchor epitope binding mAb information.**

| mAb          | Cellular Source | VH     | DH     | JH | HC Clone # | VK   | JK | KC Clone # |
|--------------|-----------------|--------|--------|----|------------|------|----|------------|
| 030-09 3E05  | Plasmablast     | 3-23   | 3-22   | 4  | Non-clonal | 3-15 | 5  | 9          |
| 030-09M 1B06 | MBC             | 3-23   | 3-10   | 4  | Non-clonal | 3-11 | 5  | 7          |
| 045-09 1A03  | Plasmablast     | 3-23   | 6-13   | 4  | Non-clonal | 3-11 | 4  | 6          |
| 045-09 2B03  | Plasmablast     | 3-23   | 5-12   | 4  | Non-clonal | 3-11 | 5  | 7          |
| 047-09 4F04  | Plasmablast     | 3-48   | 6-19   | 4  | Non-clonal | 3-15 | 4  | 8          |
| SFV009 3D04  | Plasmablast     | 3-23   | 2-2    | 4  | Non-clonal | 3-15 | 4  | 8          |
| SFV009 3G01  | Plasmablast     | 3-30   | 3-16   | 4  | Non-clonal | 3-11 | 5  | 7          |
| SFV009 3G03  | Plasmablast     | 3-23   | 3-15-3 | 5  | Non-clonal | 3-11 | 5  | 7          |
| 236 IgG 1A02 | Plasmablast     | 3-23   | 2-2    | 4  | 2          | 3-11 | 5  | 7          |
| 236 IgG 1D01 | Plasmablast     | 3-23   | 6-19   | 4  | Non-clonal | 3-11 | 5  | 7          |
| 236 IgG 1F01 | Plasmablast     | 3-23   | 2-2    | 4  | 2          | 3-11 | 5  | 7          |
| 236 IgA 1F06 | Plasmablast     | 3-23   | 2-2    | 4  | 2          | 3-11 | 5  | 7          |
| 241 IgG 2A06 | Plasmablast     | 3-23   | 6-19   | 5  | Non-Clonal | 3-15 | 4  | 8          |
| 241 IgA 1D05 | Plasmablast     | 3-23   | 5-18   | 4  | 3          | 3-15 | 5  | 9          |
| 241 IgA 2F04 | Plasmablast     | 3-23   | 2-21   | 4  | 3          | 3-15 | 5  | 9          |
| 241 IgA 2F06 | Plasmablast     | 3-23   | 3-9    | 4  | 3          | 3-15 | 5  | 9          |
| 121 2C06     | Plasmablast     | 3-23   | 2-15   | 4  | Non-clonal | 3-15 | 4  | 8          |
| 222 1C06     | Plasmablast     | 3-48   | 2-15-2 | 4  | Non-clonal | 3-15 | 4  | 8          |
| 301_91       | MBC             | 3-23   | 3-9    | 5  | Non-clonal | 3-11 | 5  | 7          |
| 301_249      | MBC             | 3-48   | 5-24   | 3  | Non-clonal | 3-11 | 4  | Non-clonal |
| 301_275      | MBC             | 3-23   | 2-21   | 4  | 1          | 3-15 | 4  | 8          |
| 308_60       | MBC             | 3-23   | 1-26   | 4  | Non-clonal | 3-11 | 4  | 8          |
| 310_10       | MBC             | 3-23   | 1-14   | 4  | Non-clonal | 3-15 | 4  | 8          |
| 310_49       | MBC             | 3-23   | 3-22   | 4  | Non-clonal | 3-15 | 5  | 9          |
| 317_30       | MBC             | 3-23   | 6-13   | 4  | Non-clonal | 3-15 | 4  | 8          |
| 317_117      | MBC             | 3-23   | 2-2    | 4  | Non-clonal | 3-15 | 5  | 9          |
| 319_75       | MBC             | 3-23   | 3-22   | 3  | Non-clonal | 3-11 | 5  | 7          |
| 319_147      | MBC             | 3-48   | 3-15-3 | 6  | Non-clonal | 3-15 | 4  | 8          |
| 319_345      | MBC             | 3-23   | 3-9    | 4  | 4          | 3-15 | 4  | 8          |
| 319_373      | MBC             | 3-23   | 6-19   | 4  | 4          | 3-15 | 4  | 8          |
| 322_48       | MBC             | 3-23   | 1-26   | 4  | 1          | 3-15 | 5  | 9          |
| 324_5        | MBC             | 3-23   | 2-21   | 3  | Non-clonal | 3-15 | 5  | 9          |
| 326_38       | MBC             | 3-23   | 1-26   | 4  | Non-clonal | 3-11 | 4  | 6          |
| 326_42       | MBC             | 3-23   | 3-16   | 5  | Non-clonal | 3-15 | 4  | 8          |
| 326_50       | MBC             | 3-30   | 5-12   | 4  | Non-clonal | 3-15 | 5  | 9          |
| 327_32       | MBC             | 3-23   | 3-10   | 4  | Non-clonal | 3-15 | 4  | 8          |
| 334_52       | MBC             | 3-48   | 6-13   | 6  | 5          | 3-15 | 4  | 8          |
| 334_53       | MBC             | 3-23   | 2-2    | 4  | Non-clonal | 3-15 | 5  | 9          |
| 334_62       | MBC             | 3-23   | 2-2    | 1  | Non-clonal | 3-11 | 4  | 6          |
| 337_32       | MBC             | 3-30   | 5-24   | 4  | Non-clonal | 3-11 | 5  | 7          |
| 337_43       | MBC             | 3-23   | 5-24   | 4  | Non-clonal | 3-15 | 4  | 8          |
| 337_95       | MBC             | 3-48   | 3-16   | 6  | Non-clonal | 3-15 | 5  | 9          |
| 346_54       | MBC             | 3-30-3 | 3-16   | 5  | Non-clonal | 3-11 | 4  | 6          |
| 347_64       | MBC             | 3-23   | 1-7    | 2  | Non-clonal | 3-11 | 5  | 7          |
| 347_246      | MBC             | 3-23   | 1-1    | 5  | Non-clonal | 3-15 | 5  | 9          |
| 350_8        | MBC             | 3-23   | 3-16   | 4  | Non-clonal | 3-15 | 4  | 8          |
| 350_22       | MBC             | 3-23   | 6-19   | 4  | Non-clonal | 3-11 | 4  | 6          |
| 350_132      | MBC             | 3-48   | 1-26   | 4  | Non-clonal | 3-15 | 4  | 8          |
| 350_145      | MBC             | 3-48   | 4-17   | 6  | 5          | 3-15 | 4  | 8          |
| 351_38       | MBC             | 3-23   | 6-13   | 4  | Non-clonal | 3-15 | 4  | 8          |
| 351_93       | MBC             | 3-23   | 1-1    | 4  | Non-clonal | 3-15 | 4  | 8          |
| 351_139      | MBC             | 3-23   | 5-24   | 4  | Non-clonal | 3-11 | 4  | 6          |

**Table S3: Mutation information for Figure 2C-D.**

| <b>Mutation</b>    | <b>Naturally Occurring?</b> | <b>045-09 2B06 Deep Mutational Scan?</b> | <b>Other Experimentally Determined?</b> | <b>Note</b>                                                            | <b>Source</b>                                                  |
|--------------------|-----------------------------|------------------------------------------|-----------------------------------------|------------------------------------------------------------------------|----------------------------------------------------------------|
| <b>H38S (HA1)</b>  |                             | No                                       | Yes                                     | Affects C179 binding                                                   | (Doud et al., 2018)                                            |
| <b>L292R (HA1)</b> |                             | Yes                                      |                                         | In footprint of many VH1-69 utilizing mAbs                             | (Lang et al., 2017)                                            |
| <b>I323V (HA1)</b> | Yes                         | No                                       |                                         | Present in pH1N1 viruses                                               | (Xu et al., 2012)                                              |
| <b>K39D (HA2)</b>  |                             | Yes                                      | Yes                                     | Contacts with VH3-30 mAb                                               | (Fu et al., 2016)                                              |
| <b>Q42E (HA2)</b>  |                             | Yes                                      | Yes                                     | Interact with CR9114 and FI6v3                                         | (Wu et al., 2020)                                              |
| <b>A44V (HA2)</b>  |                             | No                                       | Yes                                     | Expands in presence of stalk binding mAbs, escape mutant of 6F12       | (Park et al., 2020; Tan et al., 2012)                          |
| <b>I45L (HA2)</b>  |                             | Yes                                      | Yes                                     | Mutation associated with resistance to group 1 neutralizing stalk mAbs | (Lingwood et al., 2012; Wu et al., 2020; Yassine et al., 2018) |
| <b>D46R (HA2)</b>  |                             | Yes                                      |                                         | Pre-pH1N1 viruses express N46                                          |                                                                |
| <b>E47K (HA2)</b>  | Yes                         | Yes                                      |                                         | Associated with HA protein stability                                   | (Cotter et al., 2014)                                          |
| <b>T49R (HA2)</b>  |                             | Yes                                      |                                         | Mutation associated with resistance to group 1 neutralizing stalk mAbs | (Lingwood et al., 2012; Yassine et al., 2018)                  |
| <b>N50R (HA2)</b>  |                             | Yes                                      |                                         | Interacts with CR9114                                                  | (Dreyfus et al., 2012)                                         |
| <b>V52A (HA2)</b>  |                             | No                                       | Yes                                     | Affects FI6v3 mAb binding                                              | (Wu et al., 2020)                                              |
| <b>I56A (HA2)</b>  |                             | No                                       | Yes                                     | Affects F10 mAb binding                                                | (Sui et al., 2009)                                             |
| <b>E57K (HA2)</b>  |                             | Yes                                      |                                         | Critical residue for membrane fusion                                   | (Vanderlinden et al., 2010)                                    |

**Table S4: MAbs used in Figure 3 infection studies.**

| <b>mAb name</b> | <b>Epitope Specificity</b> |
|-----------------|----------------------------|
| 241 IgG 2A06    | Anchor                     |
| 047-09 4F04     | Anchor                     |
| 030-09 3E05     | Anchor                     |
| SFV009 3G01     | Anchor                     |
| 236 IgG 1A02    | Anchor                     |
| 045-09 2B06     | BN Stalk                   |
| SFV005 2G02     | BN Stalk                   |
| SFV019 4E03     | BN Stalk                   |
| 220 IgG 1A05    | BN Stalk                   |
| 241 IgA 2E06    | BN Stalk                   |

**Table S5: Group 1 HA strains used in Fig. S2C.**

| <b>HA Subtype</b> | <b>Strain Name</b>                                |
|-------------------|---------------------------------------------------|
| H1                | A/California/04/2009                              |
| H2                | A/Singapore/1/1957                                |
| H5                | A/mallard/Italy/3401/2005                         |
| H6                | A/chicken/Taiwan/0705/1999                        |
| H8                | A/turkey/Ontario/6118/1968                        |
| H9                | A/swine/HongKong/9/1998                           |
| H11               | A/duck/England/1/1956                             |
| H12               | A/duck/Alberta/60/1976                            |
| H13               | A/gull/Maryland/704/1977                          |
| H16               | A/black-headed-gull/Turkmenistan/13/1976          |
| H17               | A/little-yellow-shouldered-bat/Guatemala/060/2010 |
| H18               | A/flat-facedbat/Peru/033/2010                     |

## References

- Cotter, C.R., Jin, H., and Chen, Z. (2014). A single amino acid in the stalk region of the H1N1pdm influenza virus HA protein affects viral fusion, stability and infectivity. *PLoS Pathog* *10*, e1003831.
- Doud, M.B., Lee, J.M., and Bloom, J.D. (2018). How single mutations affect viral escape from broad and narrow antibodies to H1 influenza hemagglutinin. *Nat Commun* *9*, 1386.
- Dreyfus, C., Laursen, N.S., Kwaks, T., Zuijdgeest, D., Khayat, R., Ekiert, D.C., Lee, J.H., Metlagel, Z., Bujny, M.V., Jongeneelen, M., *et al.* (2012). Highly conserved protective epitopes on influenza B viruses. *Science* *337*, 1343-1348.
- Fu, Y., Zhang, Z., Sheehan, J., Avnir, Y., Ridenour, C., Sachnik, T., Sun, J., Hossain, M.J., Chen, L.M., Zhu, Q., *et al.* (2016). A broadly neutralizing anti-influenza antibody reveals ongoing capacity of haemagglutinin-specific memory B cells to evolve. *Nat Commun* *7*, 12780.
- Lang, S., Xie, J., Zhu, X., Wu, N.C., Lerner, R.A., and Wilson, I.A. (2017). Antibody 27F3 Broadly Targets Influenza A Group 1 and 2 Hemagglutinins through a Further Variation in VH1-69 Antibody Orientation on the HA Stem. *Cell Rep* *20*, 2935-2943.
- Lingwood, D., McTamney, P.M., Yassine, H.M., Whittle, J.R., Guo, X., Boyington, J.C., Wei, C.J., and Nabel, G.J. (2012). Structural and genetic basis for development of broadly neutralizing influenza antibodies. *Nature* *489*, 566-570.
- Park, J.K., Xiao, Y., Ramuta, M.D., Rosas, L.A., Fong, S., Matthews, A.M., Freeman, A.D., Gouzoulis, M.A., Batchenkova, N.A., Yang, X., *et al.* (2020). Pre-existing immunity to influenza virus hemagglutinin stalk might drive selection for antibody-escape mutant viruses in a human challenge model. *Nat Med* *26*, 1240-1246.
- Sui, J., Hwang, W.C., Perez, S., Wei, G., Aird, D., Chen, L.M., Santelli, E., Stec, B., Cadwell, G., Ali, M., *et al.* (2009). Structural and functional bases for broad-spectrum neutralization of avian and human influenza A viruses. *Nat Struct Mol Biol* *16*, 265-273.
- Tan, G.S., Krammer, F., Eggink, D., Kongchanagul, A., Moran, T.M., and Palese, P. (2012). A pan-H1 anti-hemagglutinin monoclonal antibody with potent broad-spectrum efficacy in vivo. *J Virol* *86*, 6179-6188.
- Vanderlinden, E., Goktas, F., Cesur, Z., Froeyen, M., Reed, M.L., Russell, C.J., Cesur, N., and Naesens, L. (2010). Novel inhibitors of influenza virus fusion: structure-activity relationship and interaction with the viral hemagglutinin. *J Virol* *84*, 4277-4288.
- Wu, N.C., Thompson, A.J., Lee, J.M., Su, W., Arlian, B.M., Xie, J., Lerner, R.A., Yen, H.L., Bloom, J.D., and Wilson, I.A. (2020). Different genetic barriers for resistance to HA stem antibodies in influenza H3 and H1 viruses. *Science* *368*, 1335-1340.
- Xu, R., Zhu, X., McBride, R., Nycholat, C.M., Yu, W., Paulson, J.C., and Wilson, I.A. (2012). Functional balance of the hemagglutinin and neuraminidase activities accompanies the emergence of the 2009 H1N1 influenza pandemic. *J Virol* *86*, 9221-9232.
- Yassine, H.M., McTamney, P.M., Boyington, J.C., Ruckwardt, T.J., Crank, M.C., Smatti, M.K., Ledgerwood, J.E., and Graham, B.S. (2018). Use of Hemagglutinin Stem Probes Demonstrate Prevalence of Broadly Reactive Group 1 Influenza Antibodies in Human Sera. *Sci Rep* *8*, 8628.
